# Supplementary material for: Constructing interface engineering and tailoring a nanoflower-like FeP/CoP heterostructure for enhanced oxygen evolution reaction
Source: Royal Society of Chemistry journal article supplement (doi:10.1039/d3ra01096a), 2023-01-01
Supplement: d3ra01096a1.pdf [file d3ra01096a1.pdf]

## Constructing Interface Engineering and Tailoring Nanoflower-like FeP/CoP

### Heterostructure Enhance Oxygen Evolution Reaction

Linhua Wang<sup>a</sup>, Hua Yang<sup>a\*</sup>, Lulan Wang<sup>a</sup>, Yunwu Li<sup>a</sup>, Wenning Yang<sup>a</sup>, Xu Sun<sup>b\*</sup>, Lingfeng Gao<sup>b</sup>, Mingyu Dou<sup>a</sup>, Dacheng Li<sup>a</sup>, Jianmin Dou<sup>a\*</sup>

<sup>a</sup> Shandong Provincial Key Laboratory of Chemical Energy Storage and Novel Cell Technology, School of Chemistry and Chemical Engineering, Liaocheng University, 252059 Liaocheng, P. R. China.

<sup>b</sup> Key Laboratory of Interfacial Reaction & Sensing Analysis in Universities of Shandong, School of Chemistry and Chemical Engineering, University of Jinan, Jinan 250022 Shandong, P. R. China.

E-mail: [yanghua@lcu.edu.cn](mailto:yanghua@lcu.edu.cn) (H. Yang), [dougroup@163.com](mailto:dougroup@163.com) (J.M. Dou).

### Contents

**Figure S1.** XRD patterns of (a) CoP-350 and FeP-350; (b) samples with different input ratios; (c) samples with different phosphating temperatures.

**Figure S2.** SEM images of (a) FeP/CoP-0.5-350; (b) FeP/CoP-2-350; (c) CoP-350; (d) FeP-350; (e) FeP/CoP-1-300; (e) FeP/CoP-1-400 and (e) FeP/CoP-1-500.

**Figure S3.** EDS spectrums of (a) FeP/CoP-0.5-350; (b) FeP/CoP-2-350; (c) CoP-350; (d) FeP-350; (e) FeP/CoP-1-300; (e) FeP/CoP-1-400 and (e) FeP/CoP-1-500.

**Figure S4.** (a) Survey XPS spectra (b) C 1s high-resolution XPS spectra of FeP/CoP-1-350, CoP-350 and FeP-350.

**Figure S5.** LSV curve of (a) FeP/CoP-1-350, Carbon powder and Bare GCE; (b) FeP/CoP-1-350/CC and Bare CC.

**Figure S6.** CVs measurement with various scan rates for all samples with various input ratios and phosphating temperatures in 1 M KOH.

**Figure S7.** LSV curves normalized by ECSA.

**Table S1.** The values of charge transfer resistance ( $R_{ct}$ ) and resistance ( $R_s$ ) for different samples.

**Table S2.** The values of ECSA for different samples.

**Table S3.** The comparison of OER performance between this work and other reported transition metal phosphide catalysts.

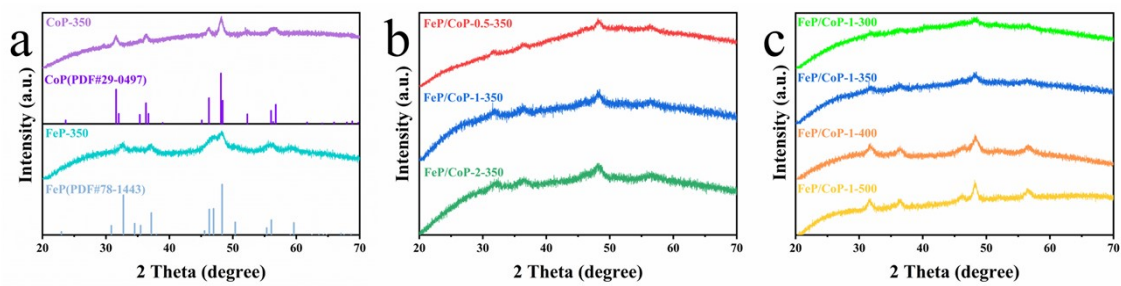

**Figure S1.** XRD patterns of (a) CoP-350 and FeP-350; (b) samples with different input ratios; (c) samples with different phosphating temperatures.

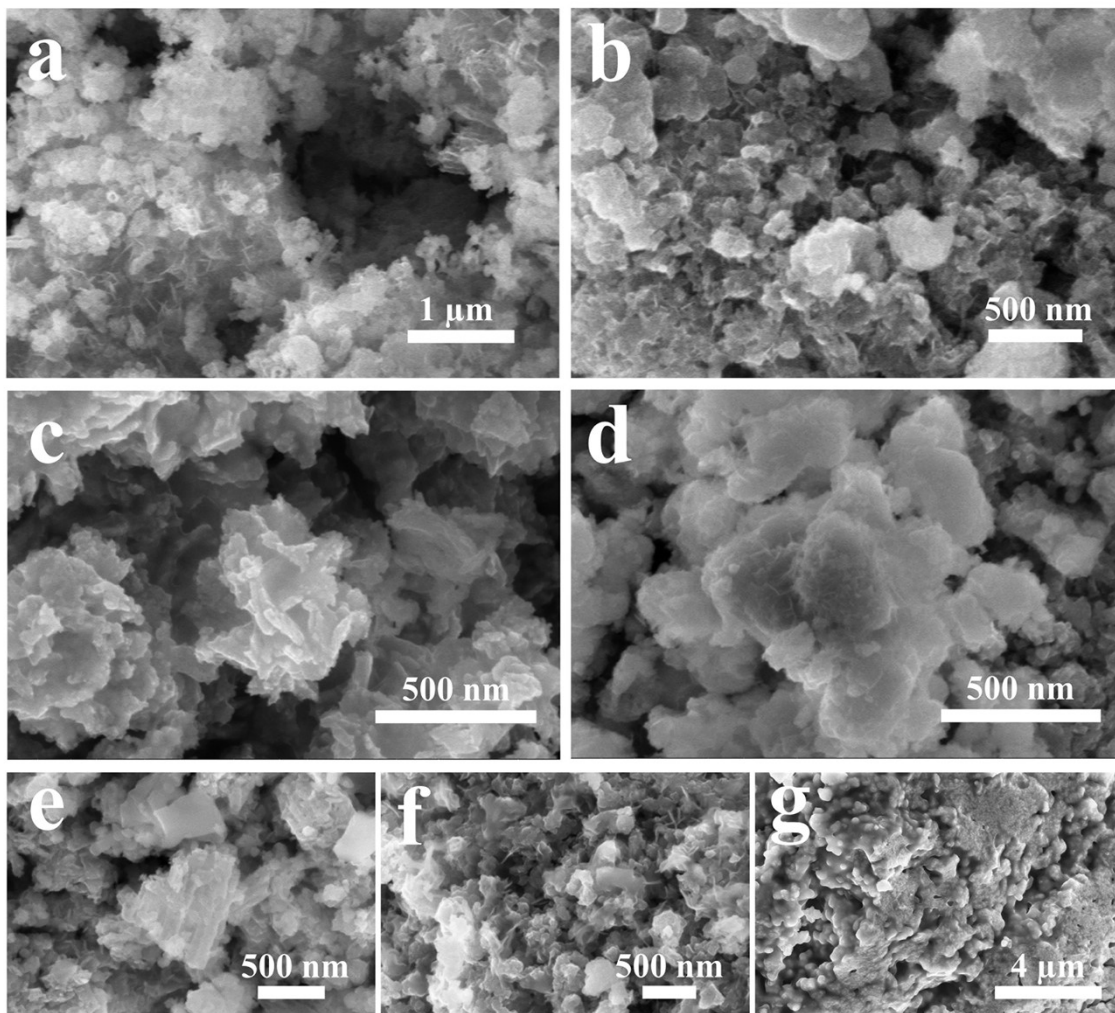

**Figure S2.** SEM images of (a) FeP/CoP-0.5-350; (b) FeP/CoP-2-350; (c) CoP-350; (d) FeP-350; (e) FeP/CoP-1-300; (f) FeP/CoP-1-400 and (g) FeP/CoP-1-500.

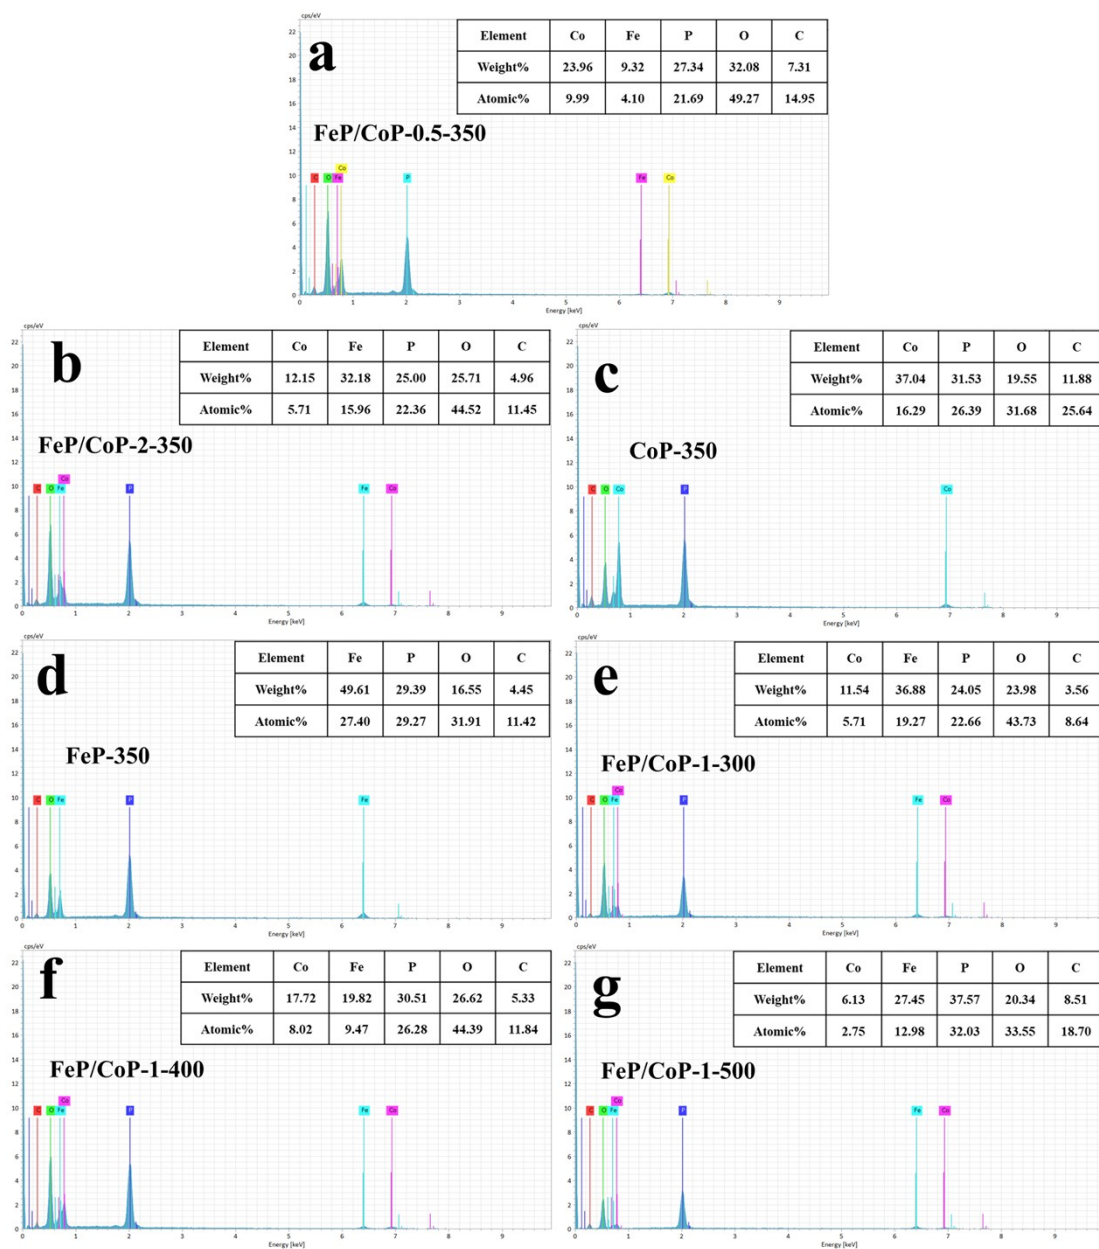

**Figure S3.** EDS spectra of (a) FeP/CoP-0.5-350; (b) FeP/CoP-2-350; (c) CoP-350; (d) FeP-350; (e) FeP/CoP-1-300; (f) FeP/CoP-1-400 and (g) FeP/CoP-1-500.

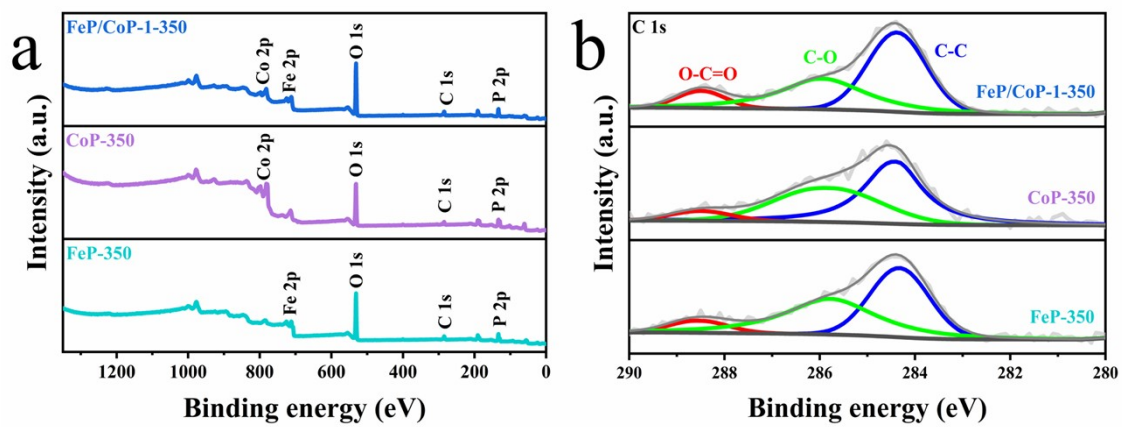

**Figure S4.** (a) Survey XPS spectra (b) C 1s high-resolution XPS spectra of FeP/CoP-1-350, CoP-350 and FeP-

350.

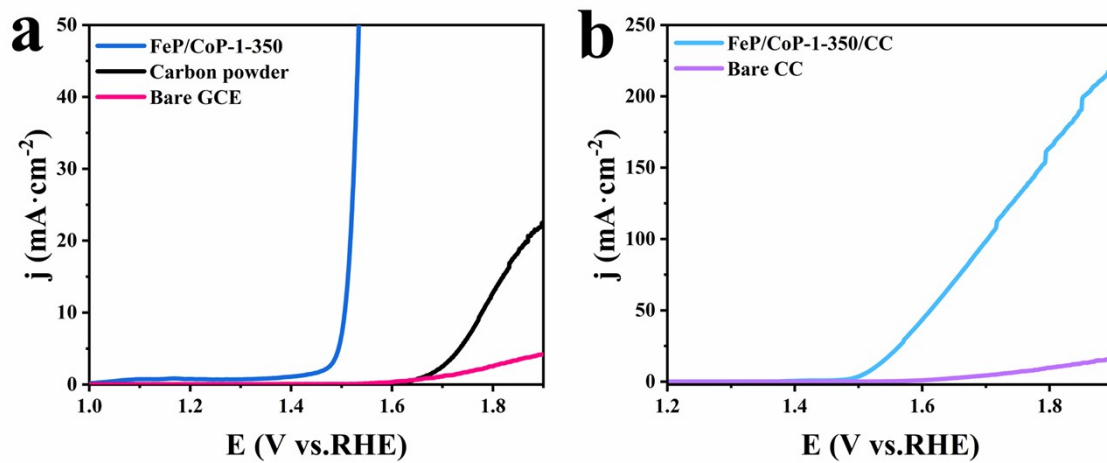

**Figure S5.** LSV curve of (a) FeP/CoP-1-350, Carbon powder and Bare GCE; (b) FeP/CoP-1-350/CC and Bare CC.

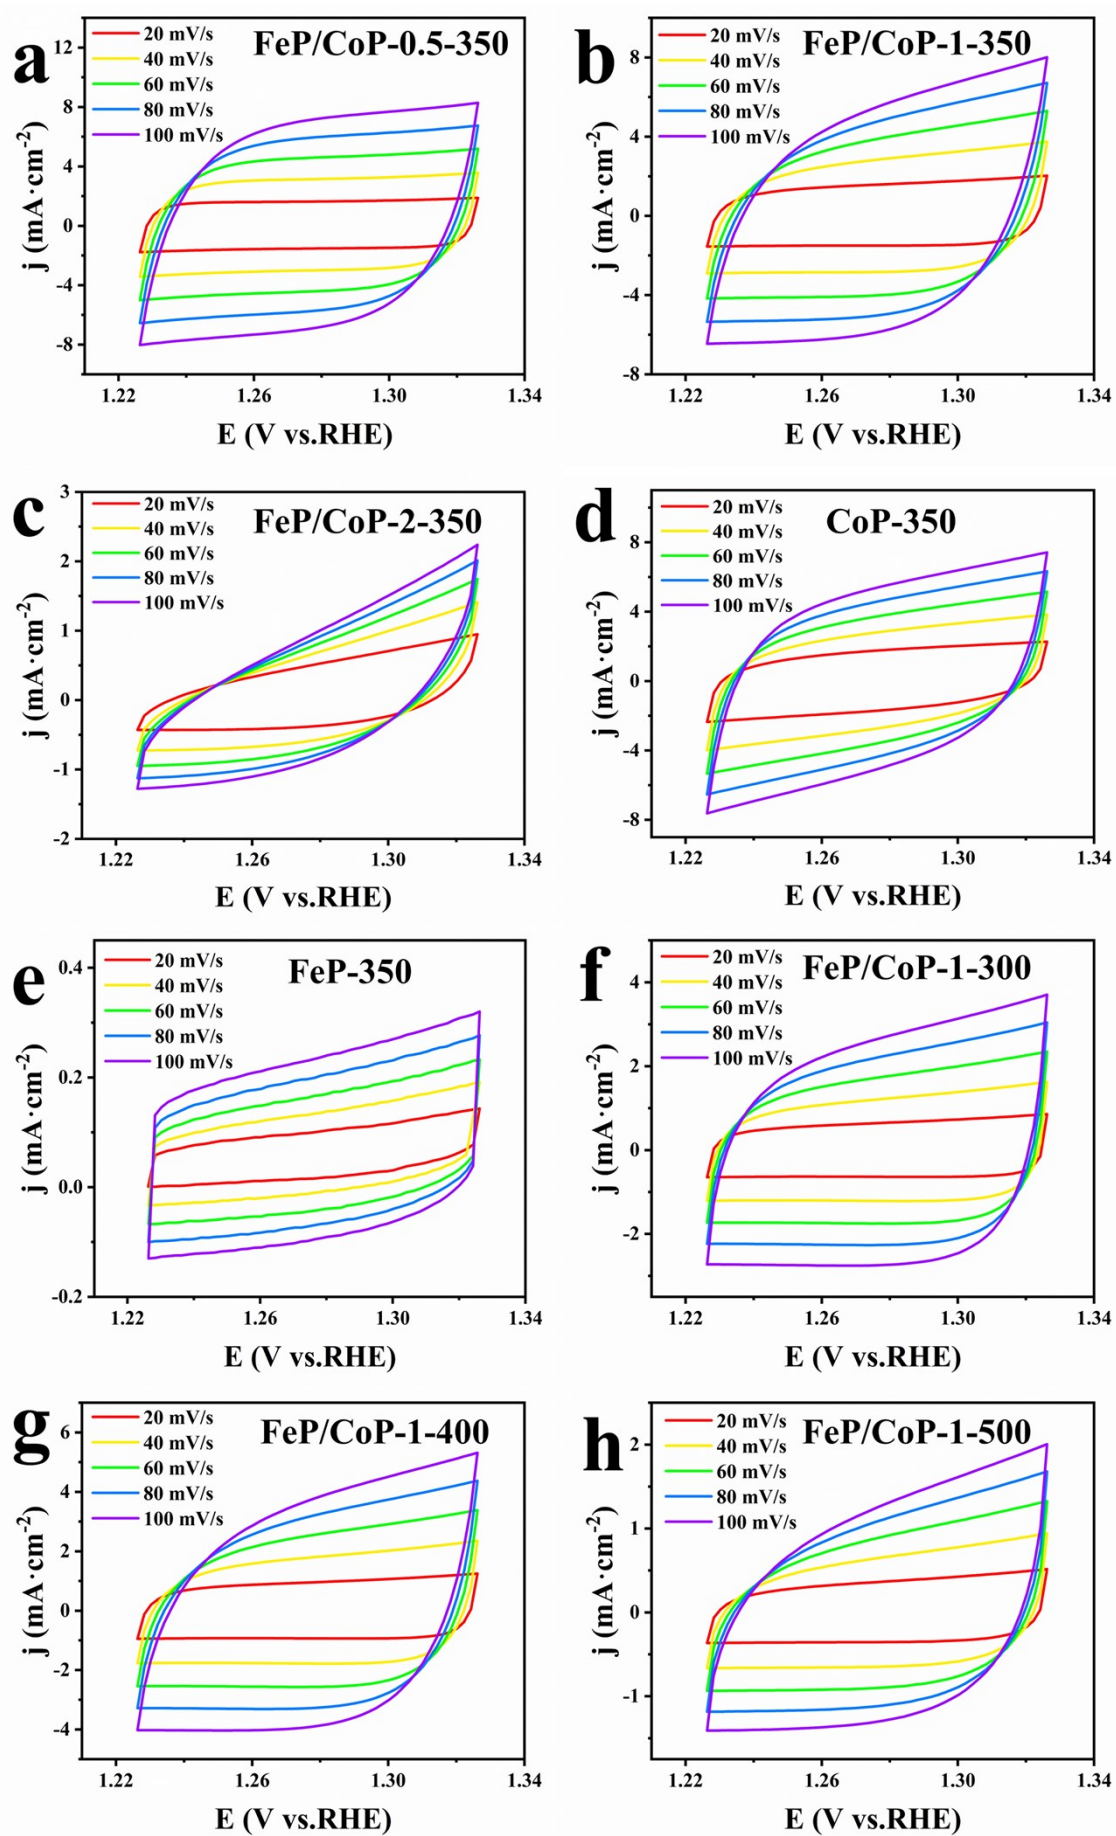

**Figure S6.** CVs measurement with various scan rates for all samples with various input ratios and phosphating temperatures in 1 M KOH.

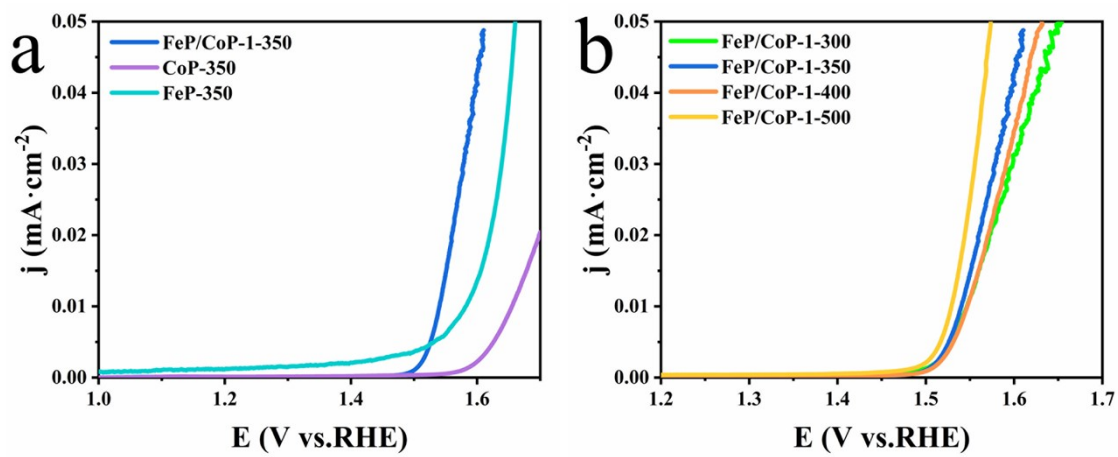

**Figure S7.** LSV curves normalized by ECSA.



**Table S1.** The values of charge transfer resistance ( $R_{ct}$ ) and resistance ( $R_s$ ) for different samples.

|                 | $R_s$ ( $\Omega$ ) | $R_{ct}$ ( $\Omega$ ) |
|-----------------|--------------------|-----------------------|
| FeP/CoP-0.5-350 | 5.206              | 10.080                |
| FeP/CoP-1-350   | 4.924              | 8.857                 |
| FeP/CoP-2-350   | 5.047              | 12.220                |
| CoP-350         | 4.949              | 15.980                |
| FeP-350         | 5.388              | 25.080                |
| FeP/CoP-1-300   | 5.011              | 9.500                 |
| FeP/CoP-1-400   | 4.813              | 9.647                 |
| FeP/CoP-1-500   | 4.855              | 11.77                 |

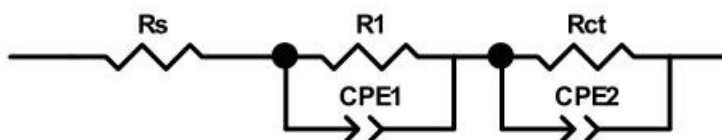

In the simplified equivalent electrical circuit,  $R_s$  is the overall series resistance,  $CPE_1$  and  $R_1$  are the constant phase element and resistance representing electron transport at CoFe-P catalyst/glassy carbon interface and between CoFe-P catalyst, respectively.  $CPE_2$  is the constant phase element of the CoFe-P catalyst/electrolyte interface, and  $R_{ct}$  is the charge transfer resistance at CoFe-P catalyst/electrolyte interface related to the OER electrocatalysis process.

**Table S2.** The values of ECSA for different samples.

|                 | ECSA (cm <sup>2</sup> ) |
|-----------------|-------------------------|
| FeP/CoP-0.5-350 | 1709                    |
| FeP/CoP-1-350   | 1292.25                 |
| FeP/CoP-2-350   | 144                     |
| CoP-350         | 1084.5                  |
| FeP-350         | 38.25                   |
| FeP/CoP-1-300   | 642                     |
| FeP/CoP-1-400   | 896.75                  |
| FeP/CoP-1-500   | 286.25                  |

**Table S3.** The comparison of OER performance between this work and other reported transition metal phosphide catalysts.

| Electrocatalysts                                  | Overpotential (mV) | Tafel slop ( $\text{mV} \cdot \text{dec}^{-1}$ ) | Reference |
|---------------------------------------------------|--------------------|--------------------------------------------------|-----------|
| FeP/CoP-1-350                                     | 276                | 37.71                                            | This Work |
| NiCoFeP hollow nanoprism                          | 294                | 50.5                                             | S1        |
| Cu-CoP nanosheets                                 | 411                | 101.4                                            | S2        |
| P@pCoPc/Co <sub>3</sub> O <sub>4</sub> nanosheets | 320                | 57.4                                             | S3        |
| CoP/NCNHP                                         | 310                | 70                                               | S4        |
| NiCoFeP films                                     | 300                | 124                                              | S5        |
| CoFeP                                             | 350                | 59                                               | S6        |
| Ce <sub>0.5</sub> -CoP                            | 365                | 96                                               | S7        |
| CoP/rGO                                           | 340                | 66                                               | S8        |
| CoP NFs                                           | 323                | 49.6                                             | S9        |
| Hollow Mo-CoP nanoboxes                           | 305                | 56                                               | S10       |
| CoP-TiOx                                          | 337                | 72.1                                             | S11       |
| Ni <sub>0.6</sub> Co <sub>1.4</sub> P             | 300                | 80                                               | S12       |

## References

- S1 B. He, C. Xu, Y. Tang, Y. Qian, H. Liu, Q. Hao and Z. Su, *J. Mater. Chem. A*, 2019, **7**, 24964-24972.
- S2 L. Yan, B. Zhang, J. Zhu, Y. Li, P. Tsiakaras and P. Kang Shen, *Appl Catal B: Environ*, 2020, **265**, 118555.
- S3 Y. Kim, D. Kim, J. Lee, L. Y. S. Lee and D. K. P. Ng, *Adv. Funct. Mater.*, 2021, **31**, 2103290.
- S4 Y. Pan, K. Sun, S. Liu, X. Cao, K. Wu, W. C. Cheong, Z. Chen, Y. Wang, Y. Li, Y. Liu, D. Wang, Q. Peng, C. Chen and Y. Li, *J Am Chem Soc*, 2018, **140**, 2610-2618.
- S5 S. Kan, M. Xu, W. Feng, Y. Wu, C. Du, X. Gao, Y. A. Wu and H. Liu, *ChemElectroChem*, 2021, **8**, 539-546.
- S6 Y. Du, H. Qu, Y. Liu, Y. Han, L. Wang and B. Dong, *Appl. Surf. Sci.*, 2019, **465**, 816-823.
- S7 J. Li, S. Zou, X. Liu, Y. Lu and D. Dong, *ACS Sustain Chem Eng*, 2020, **8**, 10009-10016.
- S8 G. Zhang, B. Wang, J. Bi, D. Fang and S. Yang, *J. Mater. Chem. A*, 2019, **7**, 5769-5778.
- S9 L. Ji, J. Wang, X. Teng, T. J. Meyer and Z. Chen, *ACS Catal*, 2019, **10**, 412-419.
- S10 C. Guan, W. Xiao, H. Wu, X. Liu, W. Zang, H. Zhang, J. Ding, Y. P. Feng, S. J. Pennycook and J. Wang, *Nano Energy*, 2018, **48**, 73-80.
- S11 Z. Liang, W. Zhou, S. Gao, R. Zhao, H. Zhang, Y. Tang, J. Cheng, T. Qiu, B. Zhu, C. Qu, W. Guo, Q. Wang and R. Zou, *Small*, 2020, **16**, 1905075.
- S12 B. Qiu, L. Cai, Y. Wang, Z. Lin, Y. Zuo, M. Wang and Y. Chai, *Adv. Funct. Mater.*, 2018, **28**, 1706008.
